# Supplementary material for: Sequence data for Clostridium autoethanogenum using three generations of sequencing technologies
Source: PubMed Central journal article supplement — Sci Data. 2015 Apr 14;2:150014. doi: 10.1038/sdata.2015.14 (PMC4409012; doi:10.1038/sdata.2015.14), 2015-04-14
Supplement: sdata201514-s2.pdf [file sdata201514-s2.pdf]

## Supplementary Information Table of Contents

|       |       |                                                       |
|-------|-------|-------------------------------------------------------|
| Pages | 1-11  | 454 Shotgun Data Quality Report                       |
| Pages | 12-22 | 454 3 kb Paired End Data Quality Report               |
| Pages | 23-31 | Ion Torrent Data Quality Report                       |
| Pages | 32-42 | Illumina Data Quality Report                          |
| Page  | 43    | Guide for Downloading Datasets using NCBI SRA Toolkit |

# 454 shotgun data Quality Report

## 1. Summary

|                               |                              |
|-------------------------------|------------------------------|
| Creation date:                | Fri Jan 09 12:50:31 EST 2015 |
| Generated by:                 | uks                          |
| Software:                     | CLC Genomics Workbench 7.5.1 |
| Based upon:                   | 1 data set                   |
| 454_Shotgun:                  | 462,052 sequences            |
| Total nucleotides in data set | 133,682,912 nucleotides      |

## 2. Per-sequence analysis

### 2.1 Lengths distribution

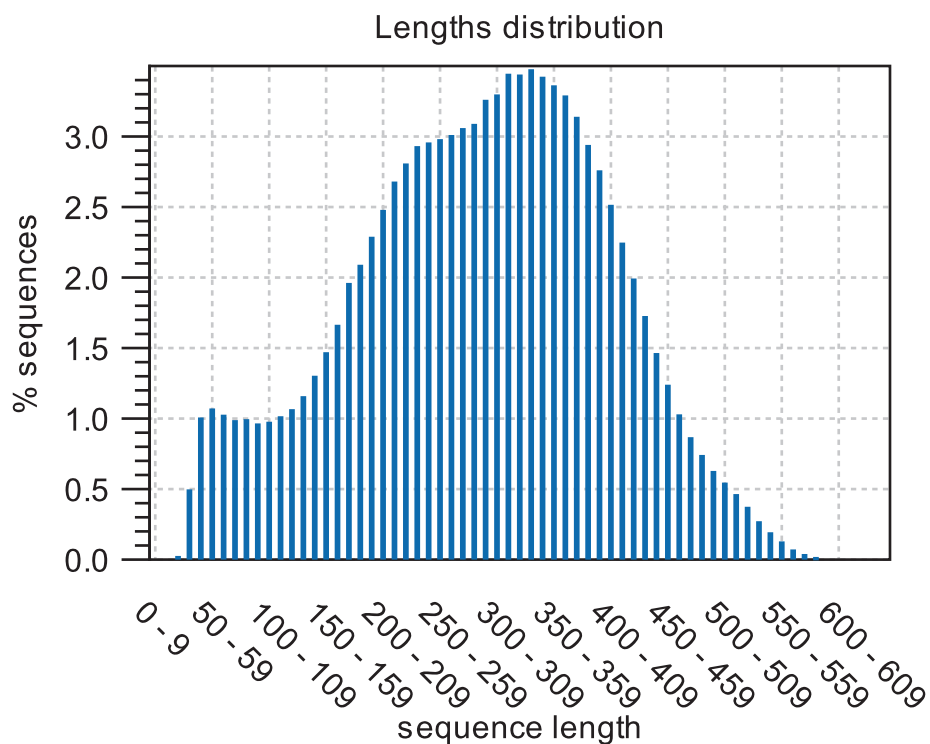

Distribution of sequence lengths. In cases of untrimmed Illumina or SOLiD reads it will just contain a single peak.

x: sequence length in base-pairs

y: number of sequences featuring a particular length normalized to the total number of sequences

## 2.2 GC-content

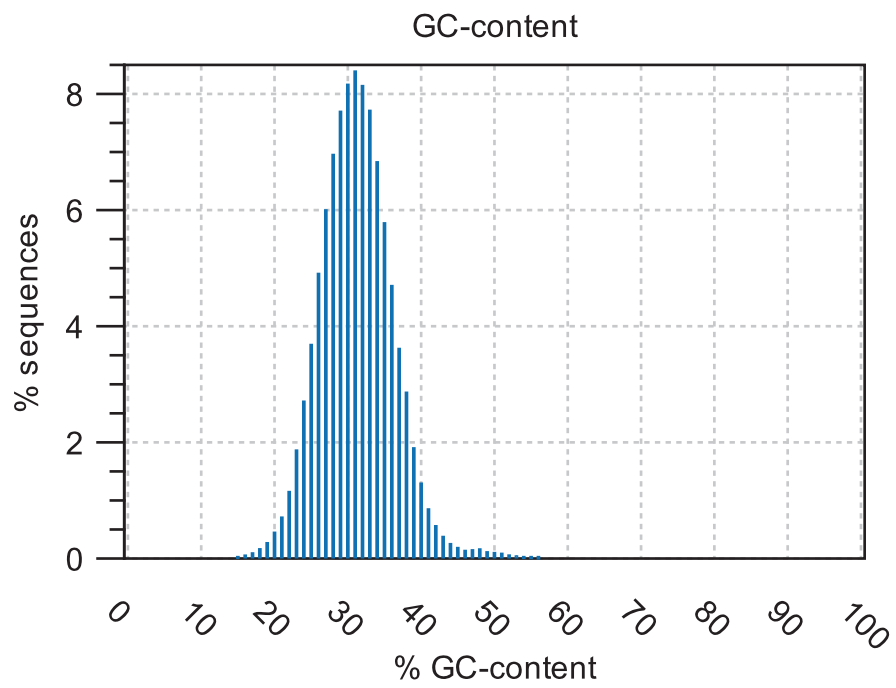

Distribution of GC-contents. The GC-content of a sequence is calculated as the number of G C-bases compared to all bases (including ambiguous bases).

x: relative GC-content of a sequence in percent

y: number of sequences featuring particular GC-percentages normalized to the total number of sequences

## 2.3 Ambiguous base-content

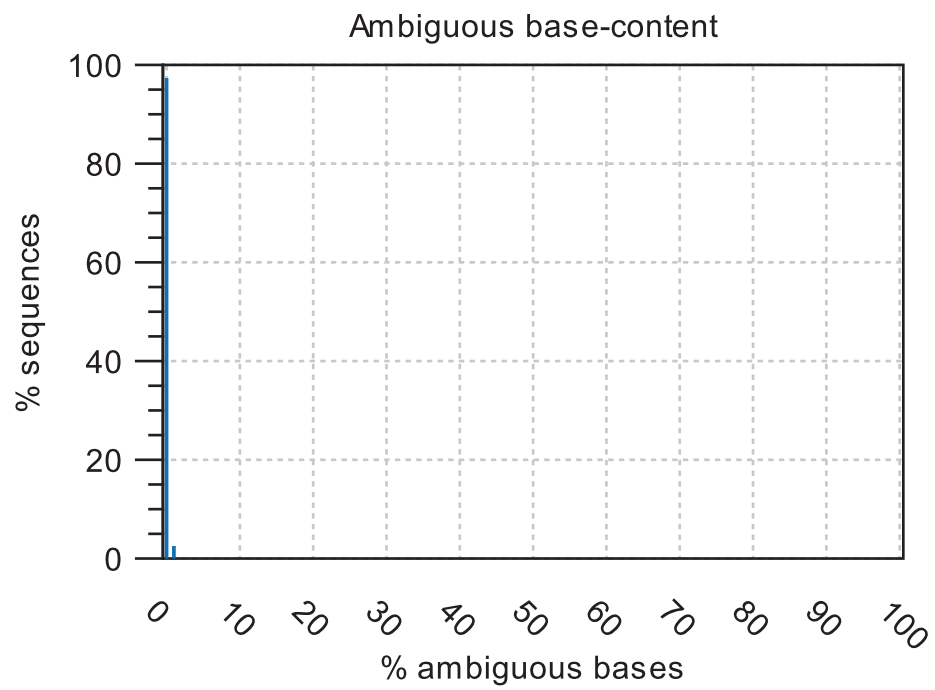

Distribution of N-contents. The N-content of a sequence is calculated as the number of ambiguous bases compared to all bases.

x: relative N-content of a sequence in percent

y: number of sequences featuring particular N-percentages normalized to the total number of sequences

## 2.4 Quality distribution

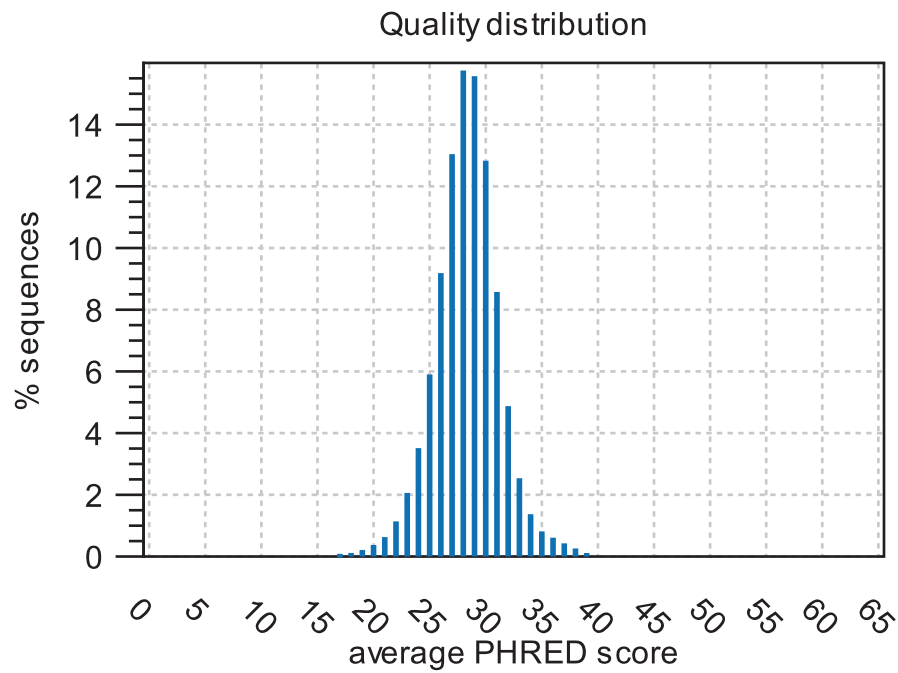

Distribution of average sequence quality scores. The quality of a sequence is calculated as the arithmetic mean of its base qualities.  
x: PHRED-score  
y: number of sequences observed at that qual. score normalized to the total number of sequences

## 3. Per-base analysis

### 3.1 Coverage

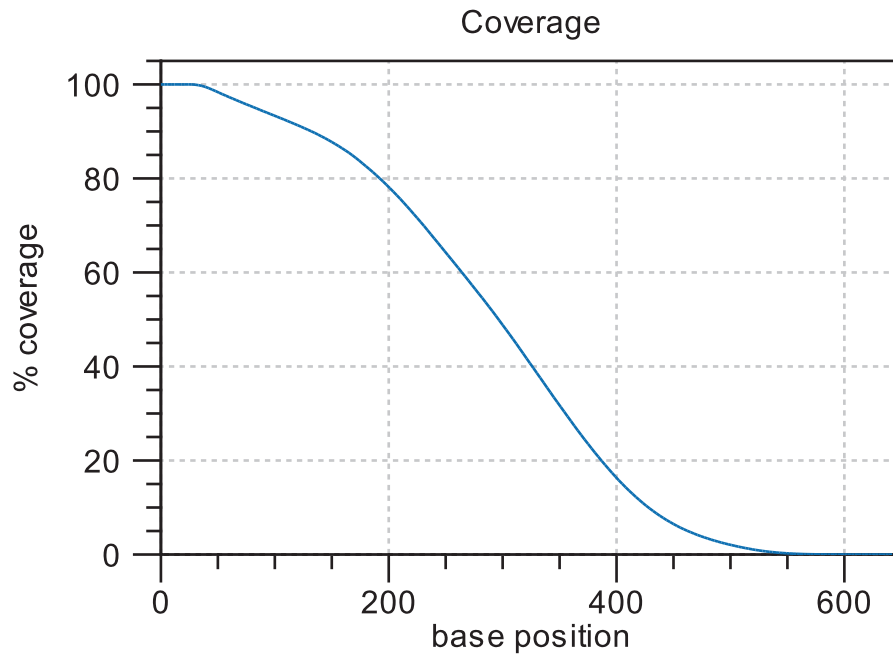

The number of sequences that support (cover) the individual base positions. In cases of untrimmed Illumina or SOLiD reads it will just contain a rectangle.

x: base position

y: number of sequences covering individual base positions normalized to the total number of sequences

## 3.2 Nucleotide contributions

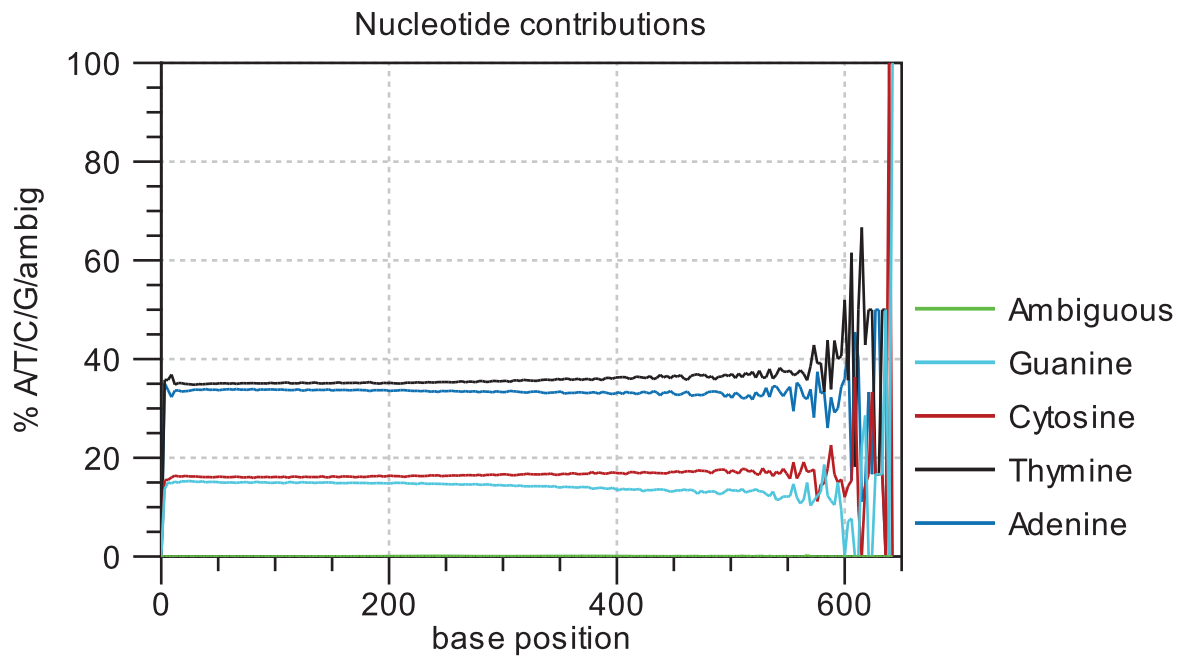

Coverages for the four DNA nucleotides and ambiguous bases.

x: base position

y: number of nucleotides observed per type normalized to the total number of nucleotides observed at that position

### 3.3 GC-content

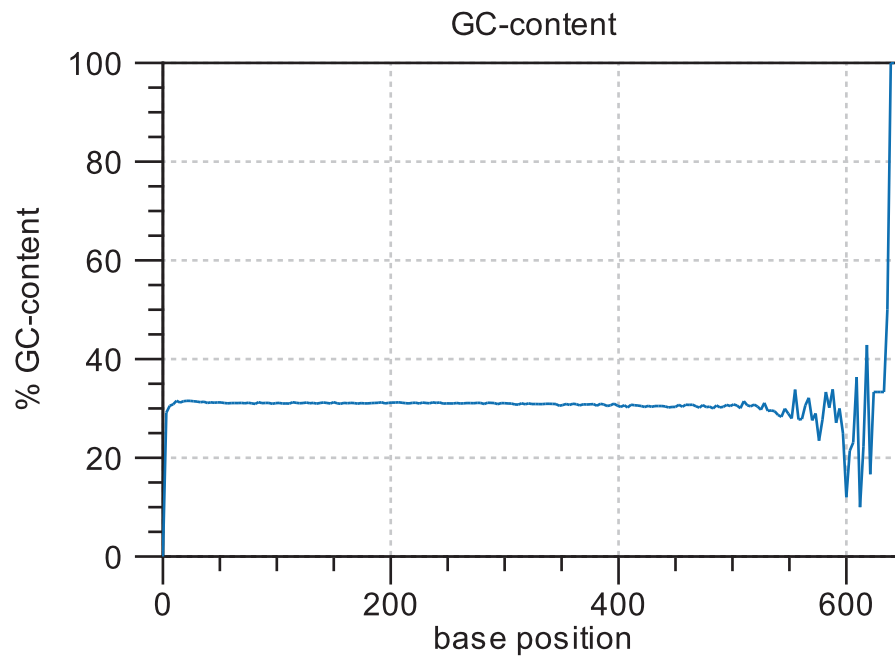

Combined coverage of G- and C-bases.

x: base position

y: number of G- and C-bases observed at current position normalized to the total number of bases observed at that position



### 3.4 Ambiguous base-content

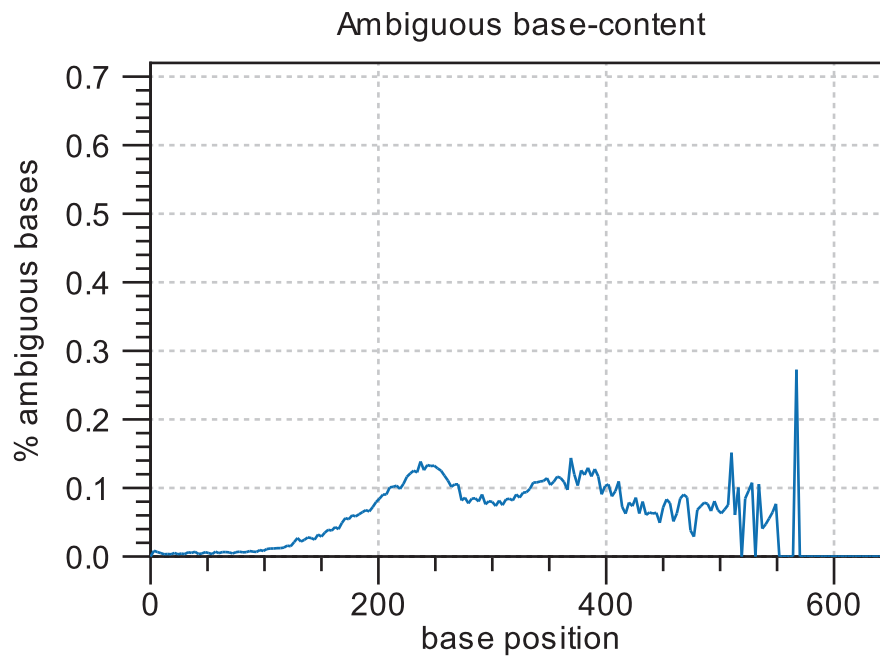

Combined coverage of ambiguous bases.

x: base position

y: number of ambiguous bases observed at current position normalized to the total number of bases observed at that position

### 3.5 Quality distribution

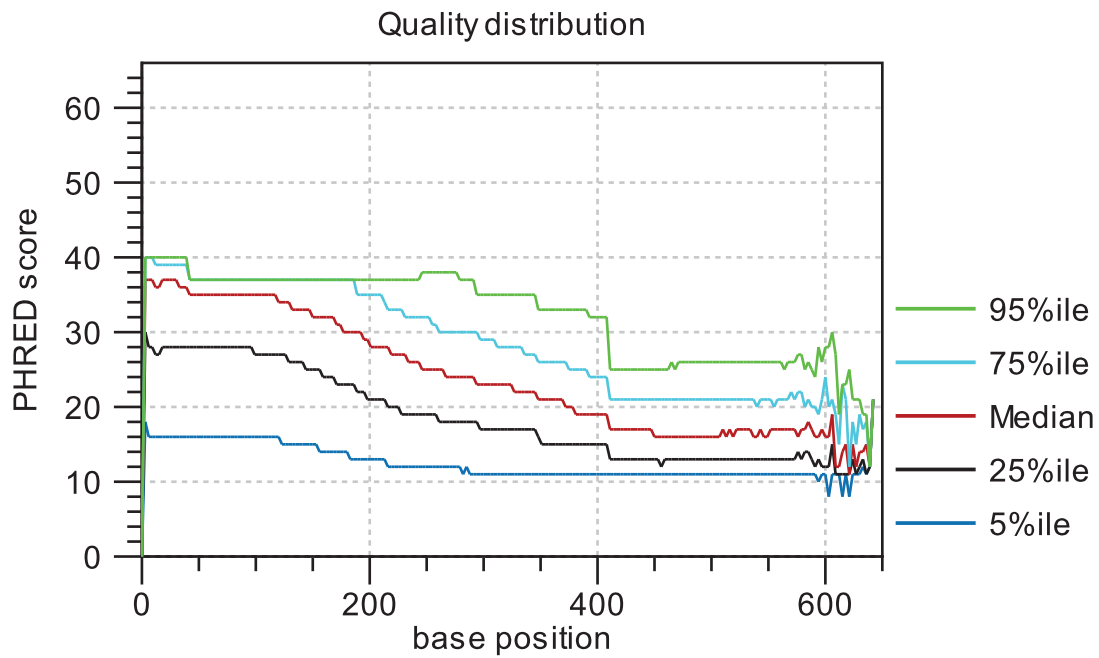

Base-quality distribution along the base positions.  
x: base position  
y: median & percentiles of quality scores observed at that base position

### 4. Over-representation analyses

## 4.1 Enriched 5mers

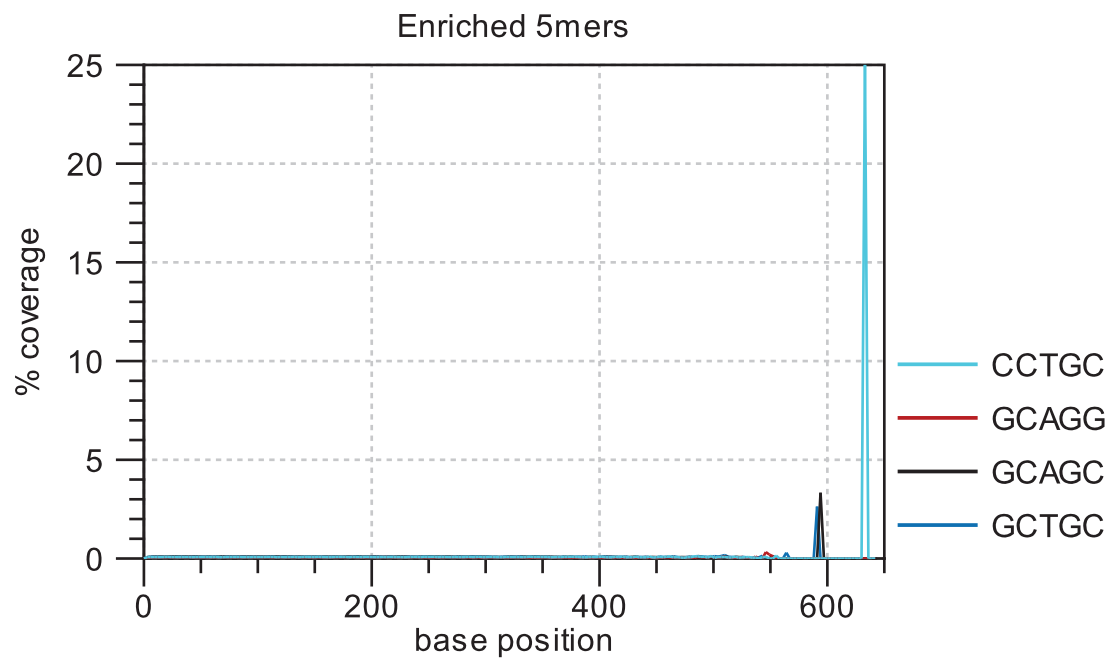

The five most-overrepresented 5mers. The over-representation of a 5mer is calculated as the ratio of the observed and expected 5mer frequency. The expected frequency is calculated as product of the empirical nucleotide probabilities that make up the 5mer. (5mers that contain ambiguous bases are ignored)

x: base position

y: number of times a 5mer has been observed normalized to all 5mers observed at that position

## 4.2 Sequence duplication levels

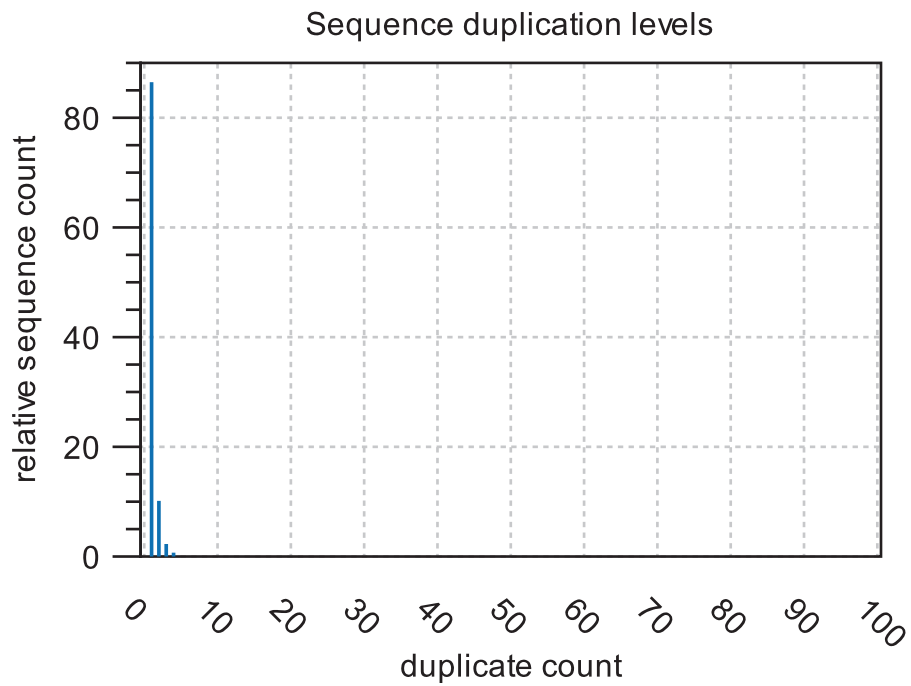

Duplication level distribution. Duplication levels are simply the count of how often a particular sequence has been found.  
x: duplicate count  
y: number of sequences that have been found that many times normalized to the number of unique sequences

## 4.3 Duplicated sequences

A table of over-represented sequences is given in the supplementary report

# 454 3KB data Quality Report

## 1. Summary

|                                |                              |
|--------------------------------|------------------------------|
| Creation date:                 | Thu Dec 11 14:06:09 EST 2014 |
| Generated by:                  | uks                          |
| Software:                      | CLC Genomics Workbench 7.5.1 |
| Based upon:                    | 2 data sets                  |
| GQW19BL01 (single):            | 128,856 sequences            |
| GQW19BL01 (paired):            | 764,756 sequences in pairs   |
| Total nucleotides in data sets | 150,922,863 nucleotides      |

## 2. Per-sequence analysis

### 2.1 Lengths distribution

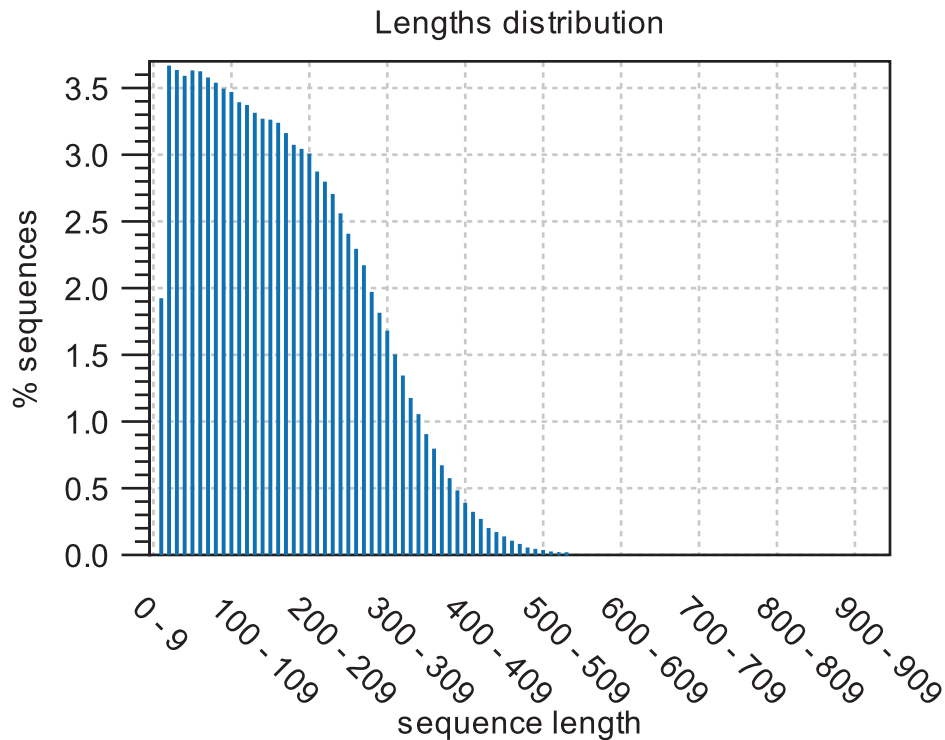

Distribution of sequence lengths. In cases of untrimmed Illumina or SOLiD reads it will just contain a single peak.

x: sequence length in base-pairs

y: number of sequences featuring a particular length normalized to the total number of sequences

## 2.2 GC-content

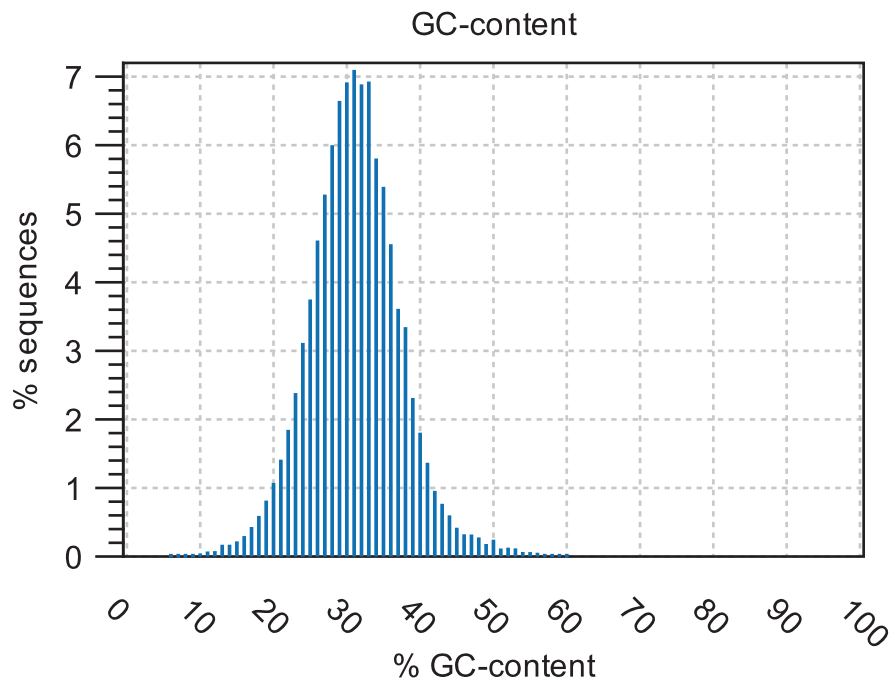

Distribution of GC-contents. The GC-content of a sequence is calculated as the number of G C-bases compared to all bases (including ambiguous bases).

x: relative GC-content of a sequence in percent

y: number of sequences featuring particular GC-percentages normalized to the total number of sequences

## 2.3 Ambiguous base-content

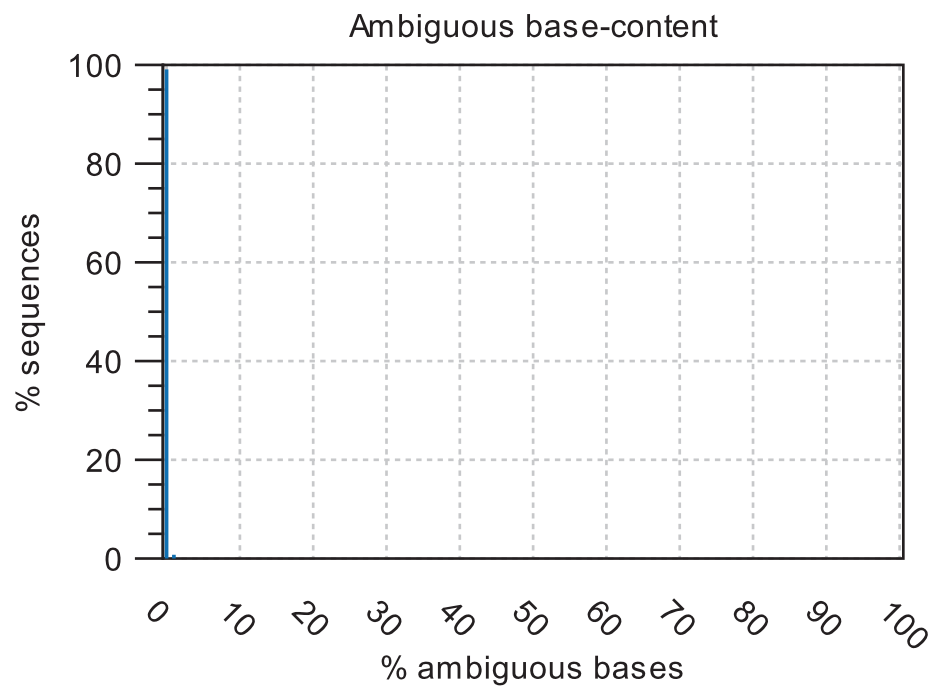

Distribution of N-contents. The N-content of a sequence is calculated as the number of ambiguous bases compared to all bases.

x: relative N-content of a sequence in percent

y: number of sequences featuring particular N-percentages normalized to the total number of sequences

## 2.4 Quality distribution

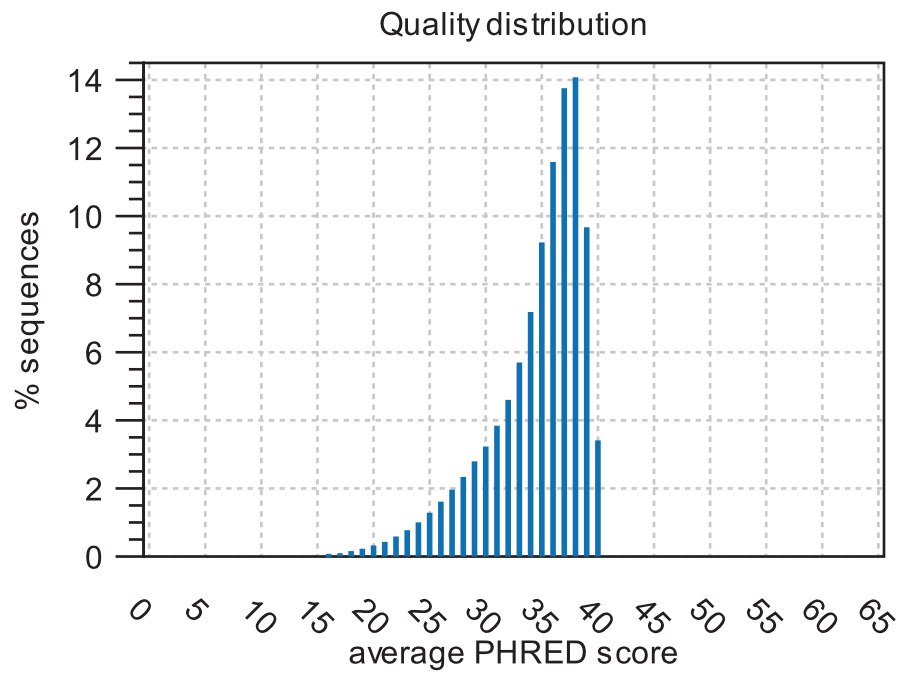

Distribution of average sequence quality scores. The quality of a sequence is calculated as the arithmetic mean of its base qualities.

x: PHRED-score

y: number of sequences observed at that qual. score normalized to the total number of sequences

## 3. Per-base analysis



## 3.1 Coverage

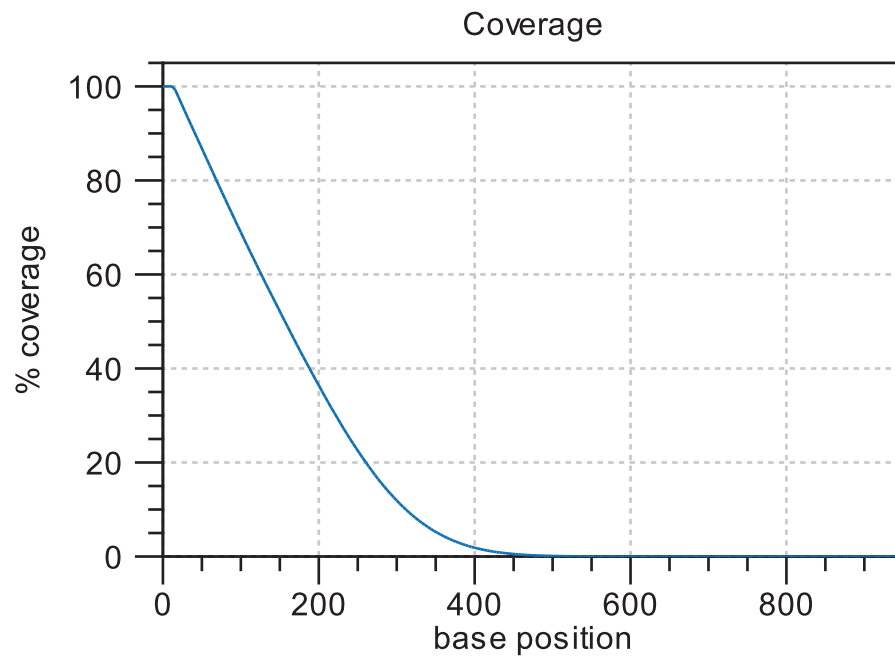

The number of sequences that support (cover) the individual base positions. In cases of untrimmed Illumina or SOLiD reads it will just contain a rectangle.

x: base position

y: number of sequences covering individual base positions normalized to the total number of sequences

## 3.2 Nucleotide contributions

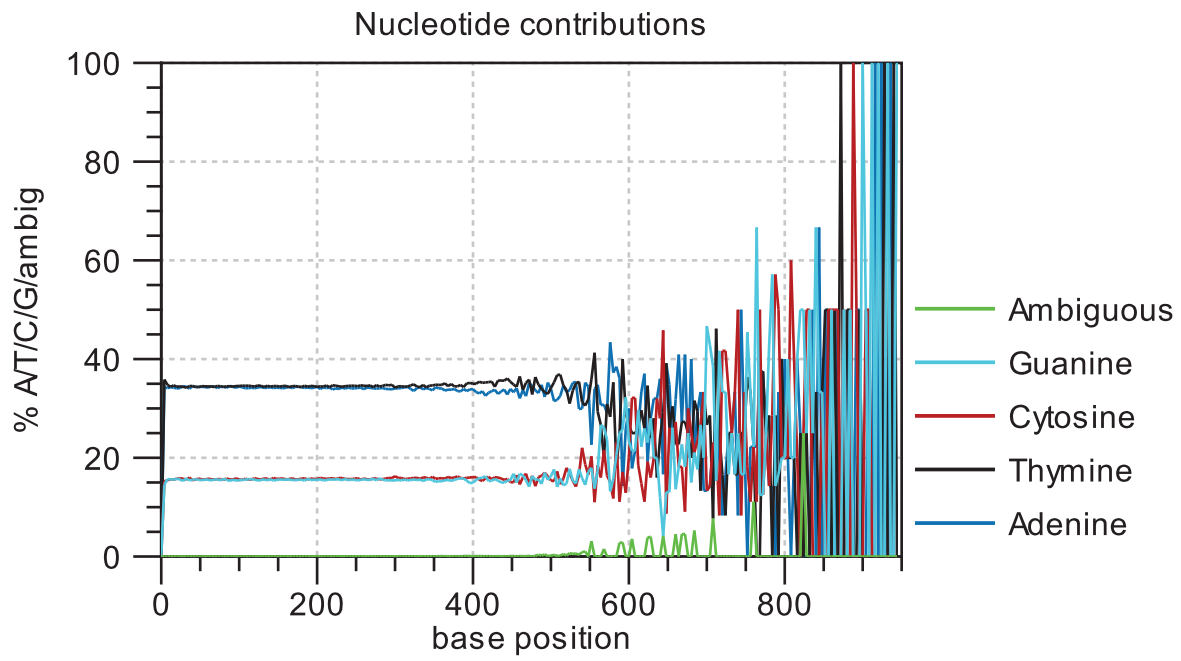

Coverages for the four DNA nucleotides and ambiguous bases.

x: base position

y: number of nucleotides observed per type normalized to the total number of nucleotides observed at that position

### 3.3 GC-content

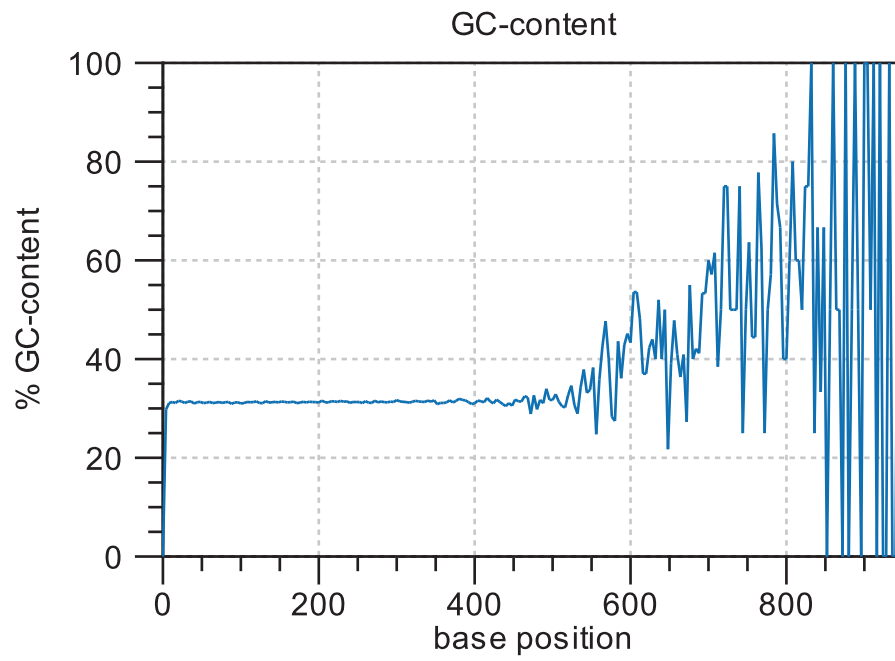

Combined coverage of G- and C-bases.

x: base position

y: number of G- and C-bases observed at current position normalized to the total number of bases observed at that position

### 3.4 Ambiguous base-content

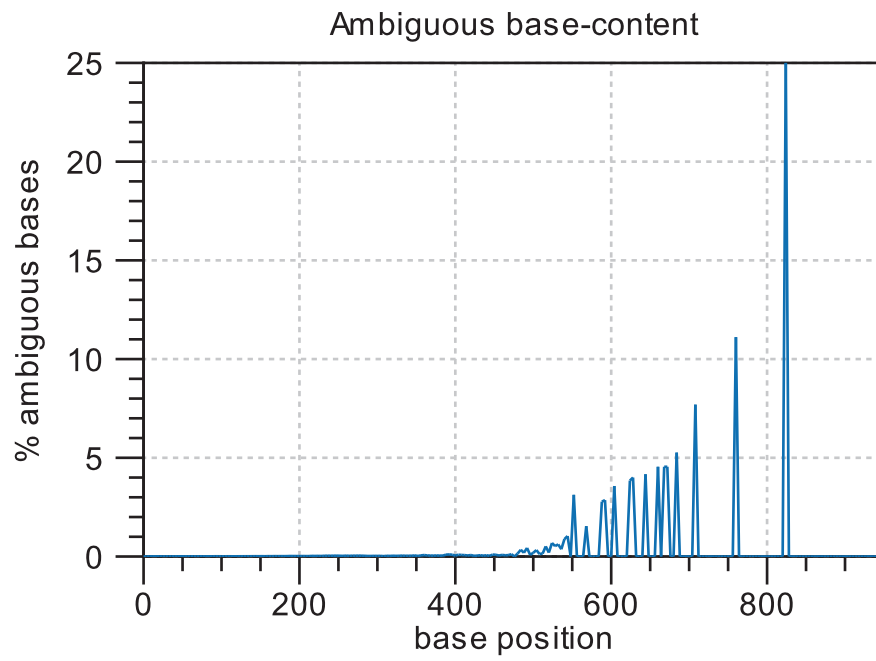

Combined coverage of ambiguous bases.

x: base position

y: number of ambiguous bases observed at current position normalized to the total number of bases observed at that position

### 3.5 Quality distribution

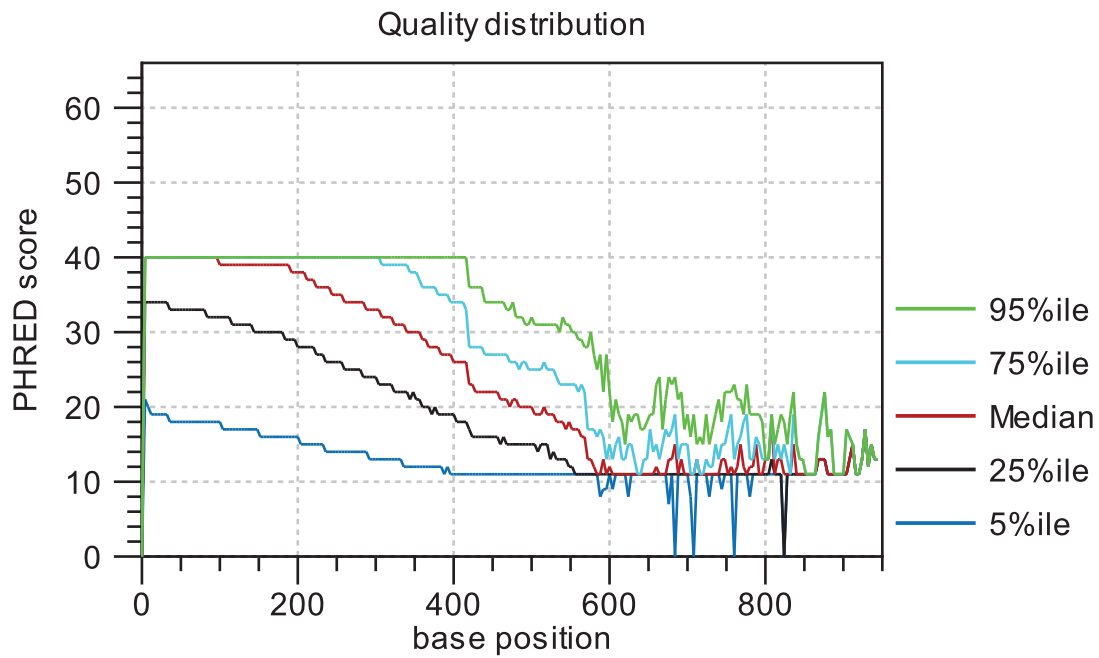

Base-quality distribution along the base positions.  
x: base position  
y: median & percentiles of quality scores observed at that base position

### 4. Over-representation analyses

## 4.1 Enriched 5mers

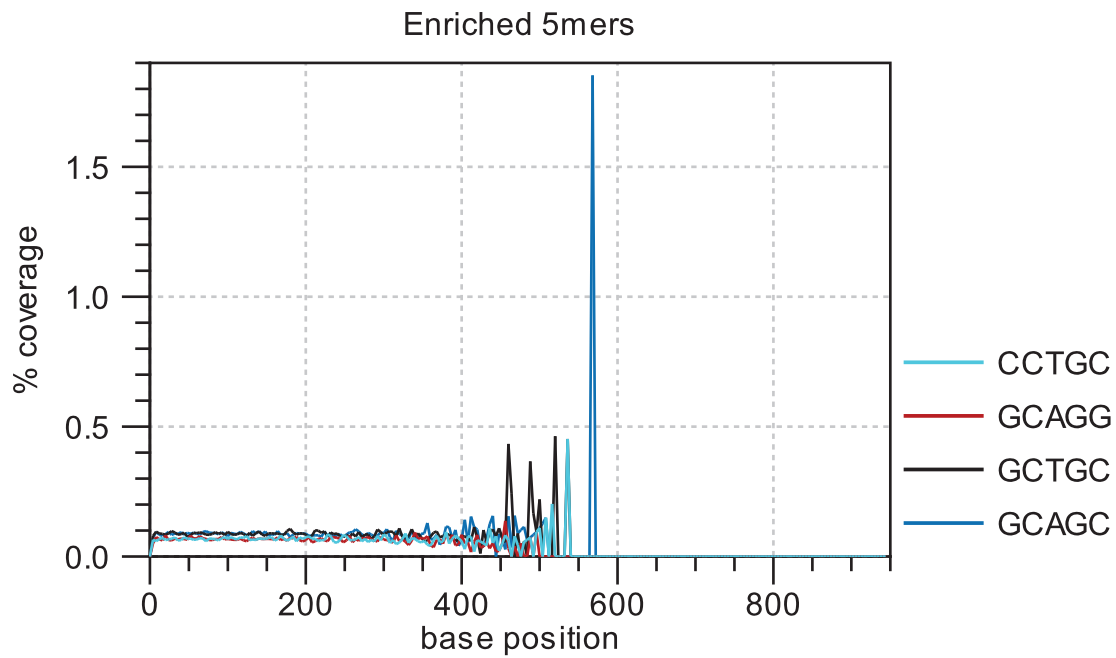

The five most-overrepresented 5mers. The over-representation of a 5mer is calculated as the ratio of the observed and expected 5mer frequency. The expected frequency is calculated as product of the empirical nucleotide probabilities that make up the 5mer. (5mers that contain ambiguous bases are ignored)

x: base position

y: number of times a 5mer has been observed normalized to all 5mers observed at that position

## 4.2 Sequence duplication levels

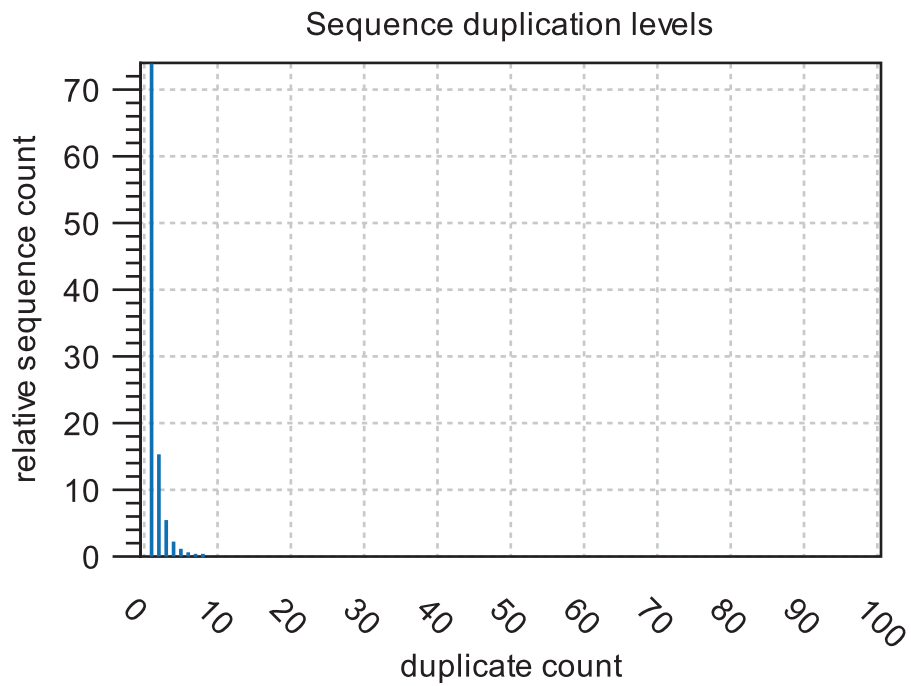

Duplication level distribution. Duplication levels are simply the count of how often a particular sequence has been found.  
x: duplicate count  
y: number of sequences that have been found that many times normalized to the number of unique sequences

## 4.3 Duplicated sequences

A table of over-represented sequences is given in the supplementary report

# Ion Torrent data Quality Report

## 1. Summary

|                               |                              |
|-------------------------------|------------------------------|
| Creation date:                | Fri Jan 09 12:50:19 EST 2015 |
| Generated by:                 | uks                          |
| Software:                     | CLC Genomics Workbench 7.5.1 |
| Based upon:                   | 1 data set                   |
| Ion_Torrent:                  | 453,686 sequences            |
| Total nucleotides in data set | 97,658,077 nucleotides       |

## 2. Per-sequence analysis

### 2.1 Lengths distribution

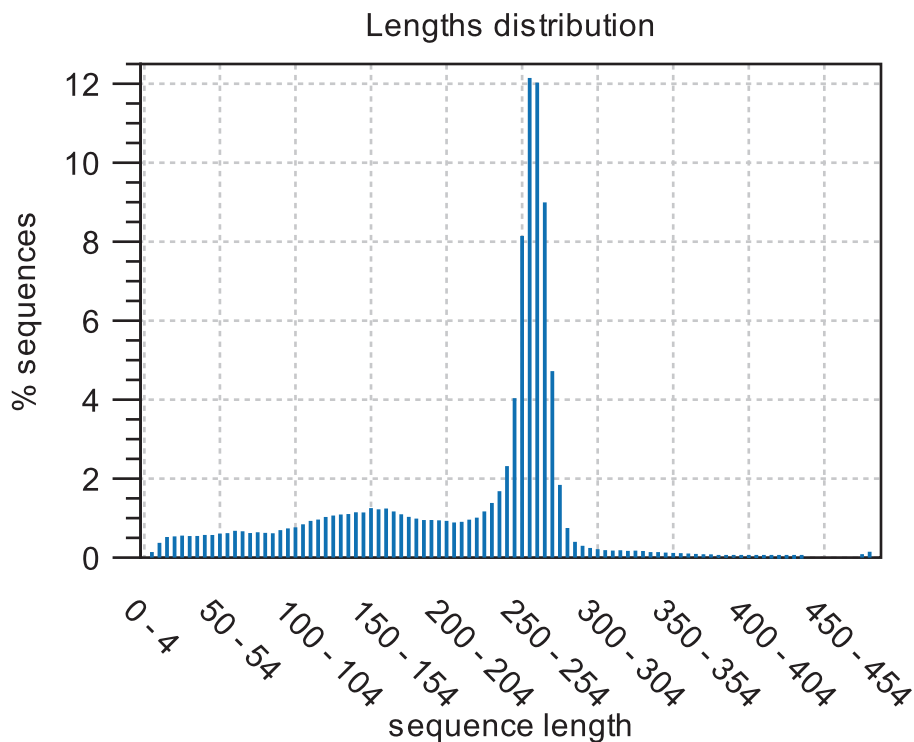

Distribution of sequence lengths. In cases of untrimmed Illumina or SOLiD reads it will just contain a single peak.

x: sequence length in base-pairs

y: number of sequences featuring a particular length normalized to the total number of sequences



## 2.2 GC-content

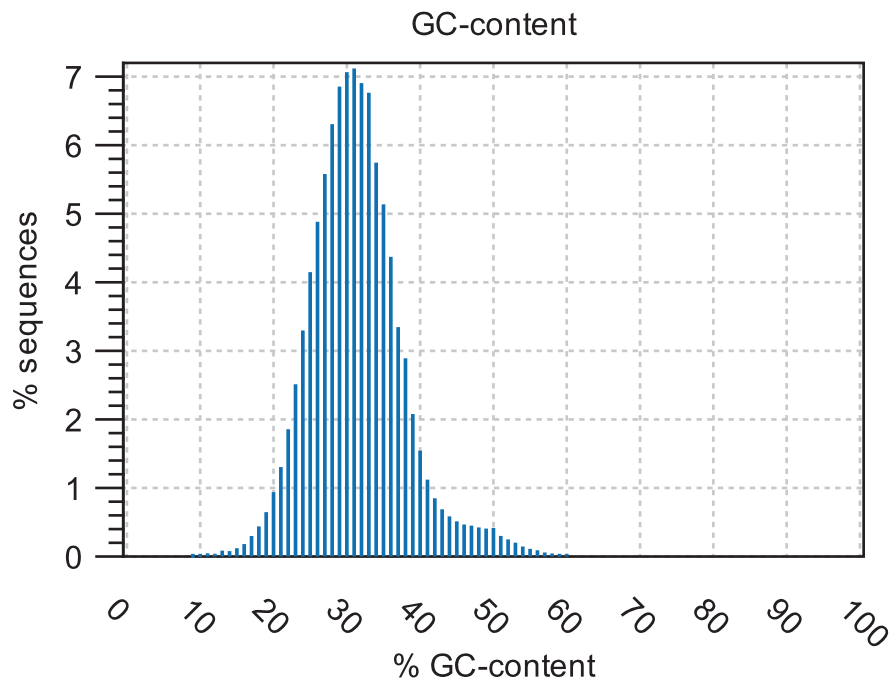

Distribution of GC-contents. The GC-content of a sequence is calculated as the number of G C-bases compared to all bases (including ambiguous bases).

x: relative GC-content of a sequence in percent

y: number of sequences featuring particular GC-percentages normalized to the total number of sequences

## 2.3 Ambiguous base-content

No ambiguous bases detected

## 2.4 Quality distribution

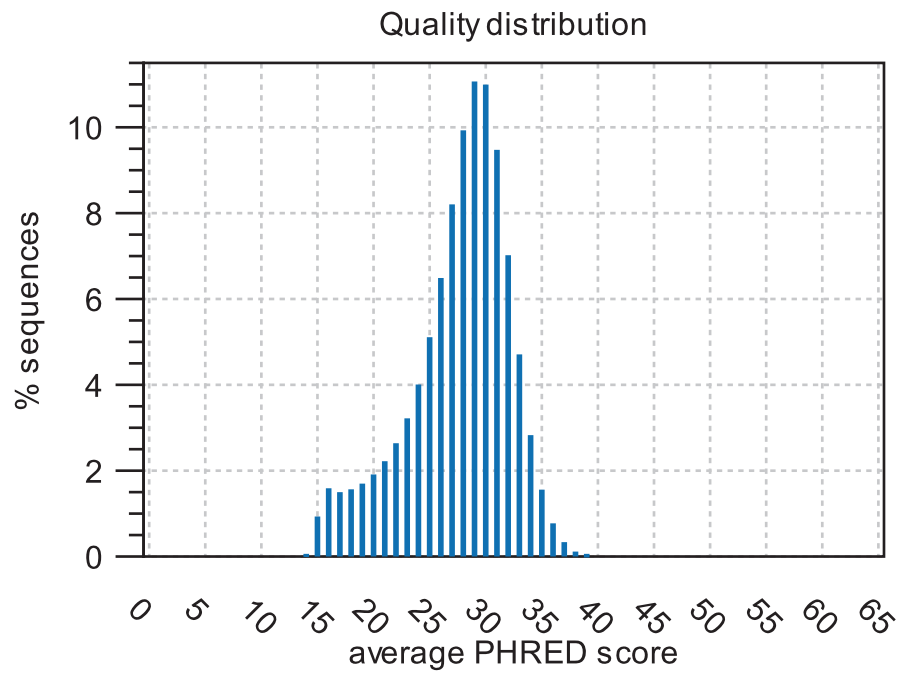

Distribution of average sequence quality scores. The quality of a sequence is calculated as the arithmetic mean of its base qualities.  
x: PHRED-score  
y: number of sequences observed at that qual. score normalized to the total number of sequences

## 3. Per-base analysis

### 3.1 Coverage

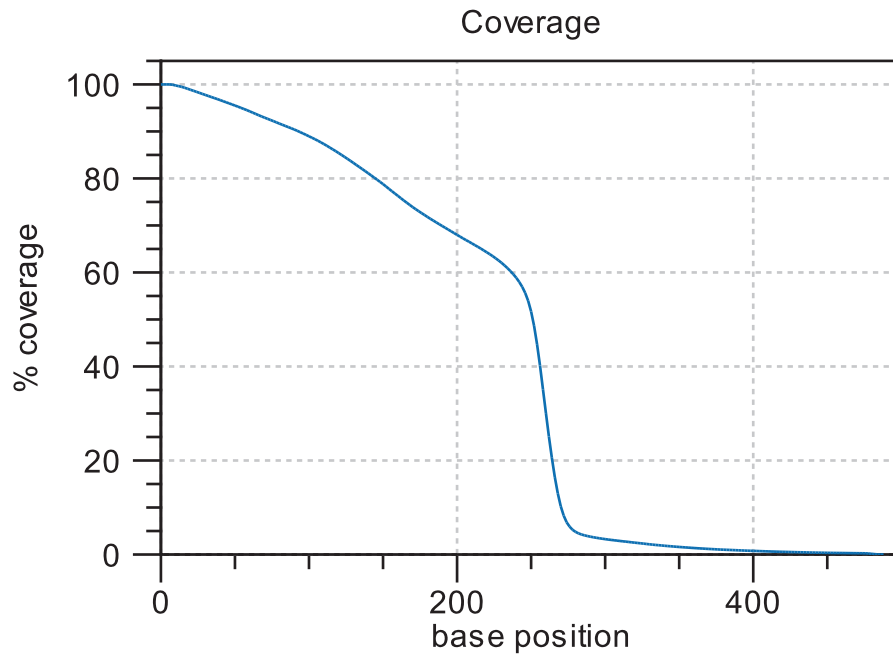

The number of sequences that support (cover) the individual base positions. In cases of untrimmed Illumina or SOLiD reads it will just contain a rectangle.

x: base position

y: number of sequences covering individual base positions normalized to the total number of sequences

## 3.2 Nucleotide contributions

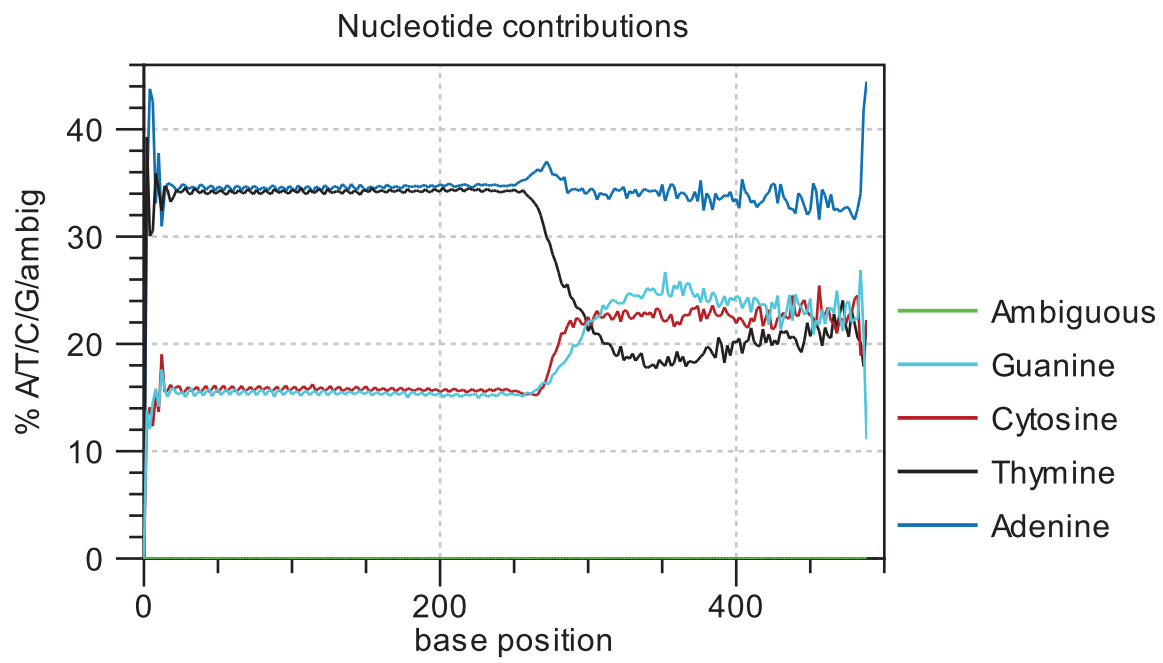

Coverages for the four DNA nucleotides and ambiguous bases.

x: base position

y: number of nucleotides observed per type normalized to the total number of nucleotides observed at that position

### 3.3 GC-content

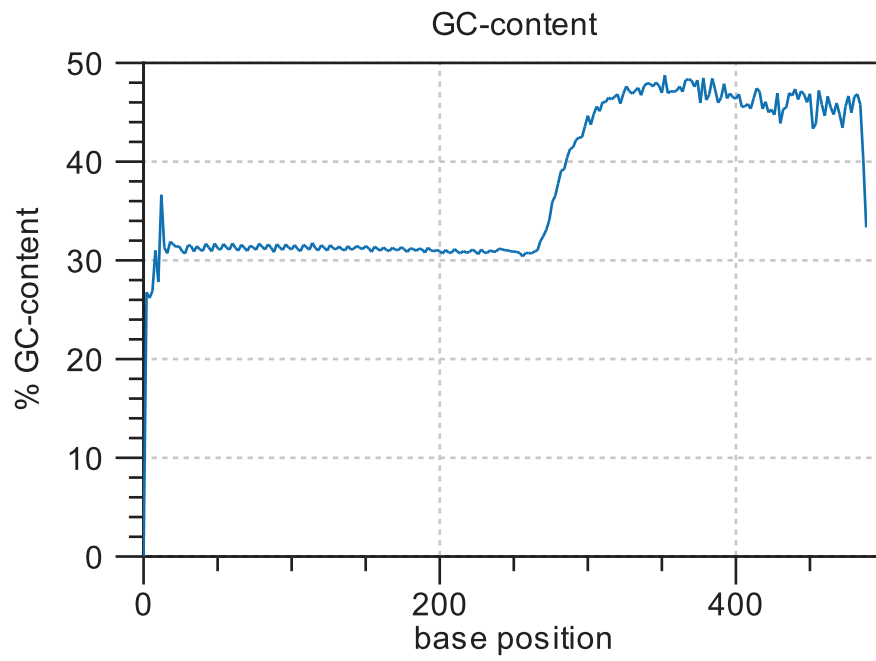

Combined coverage of G- and C-bases.

x: base position

y: number of G- and C-bases observed at current position normalized to the total number of bases observed at that position

### 3.4 Ambiguous base-content

No ambiguous bases detected

### 3.5 Quality distribution

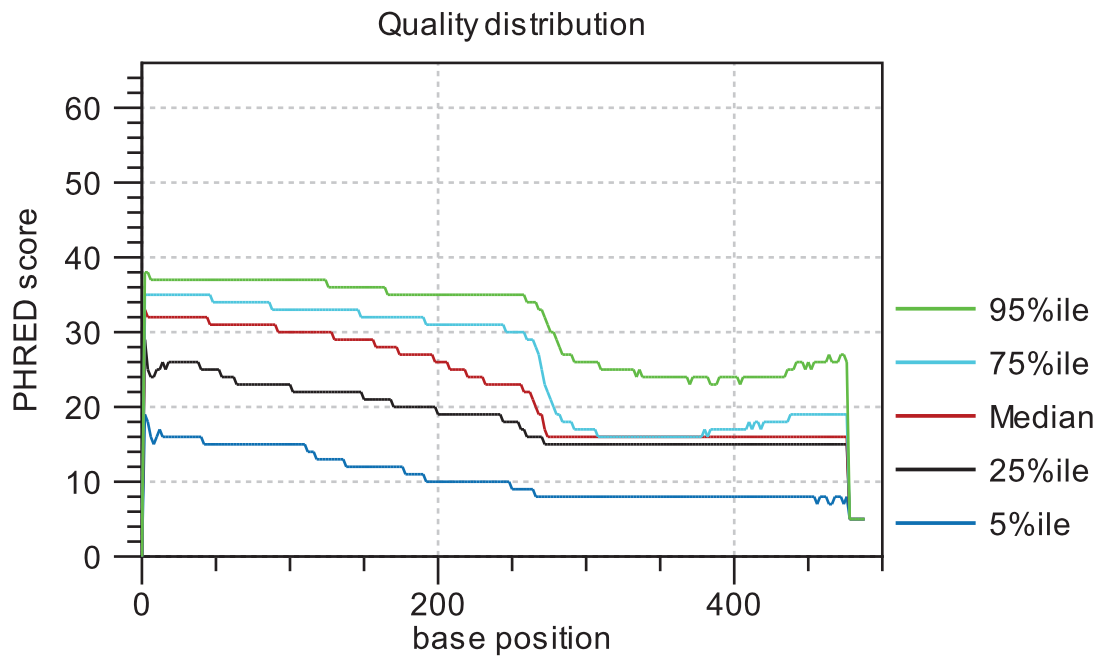

Base-quality distribution along the base positions.  
x: base position  
y: median & percentiles of quality scores observed at that base position

### 4. Over-representation analyses

## 4.1 Enriched 5mers

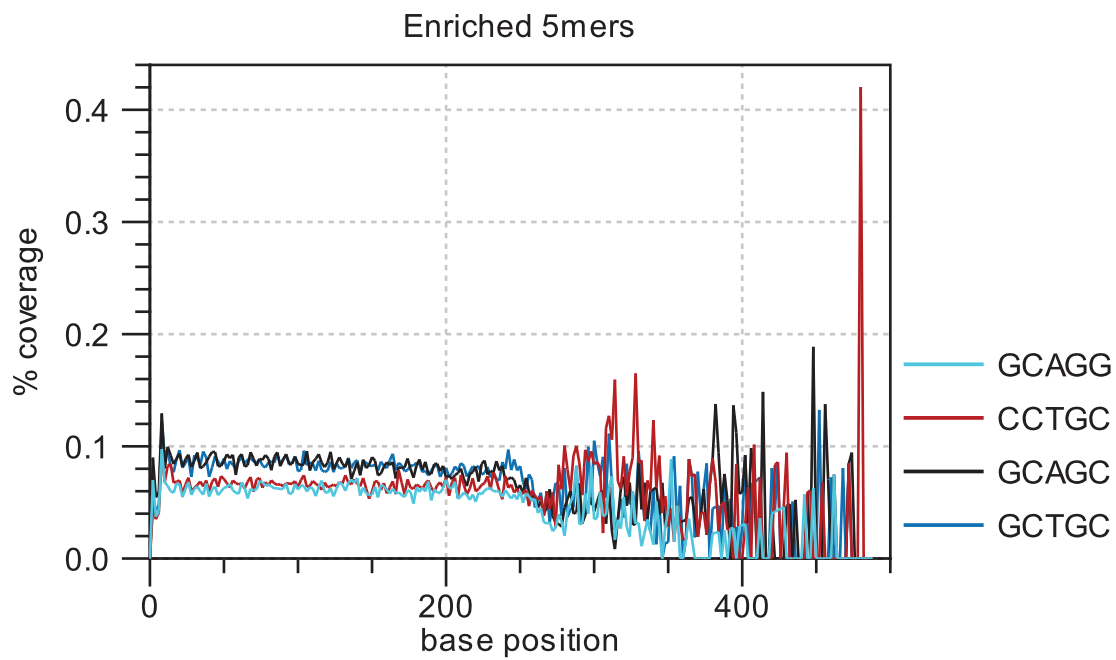

The five most-overrepresented 5mers. The over-representation of a 5mer is calculated as the ratio of the observed and expected 5mer frequency. The expected frequency is calculated as product of the empirical nucleotide probabilities that make up the 5mer. (5mers that contain ambiguous bases are ignored)

x: base position

y: number of times a 5mer has been observed normalized to all 5mers observed at that position

## 4.2 Sequence duplication levels

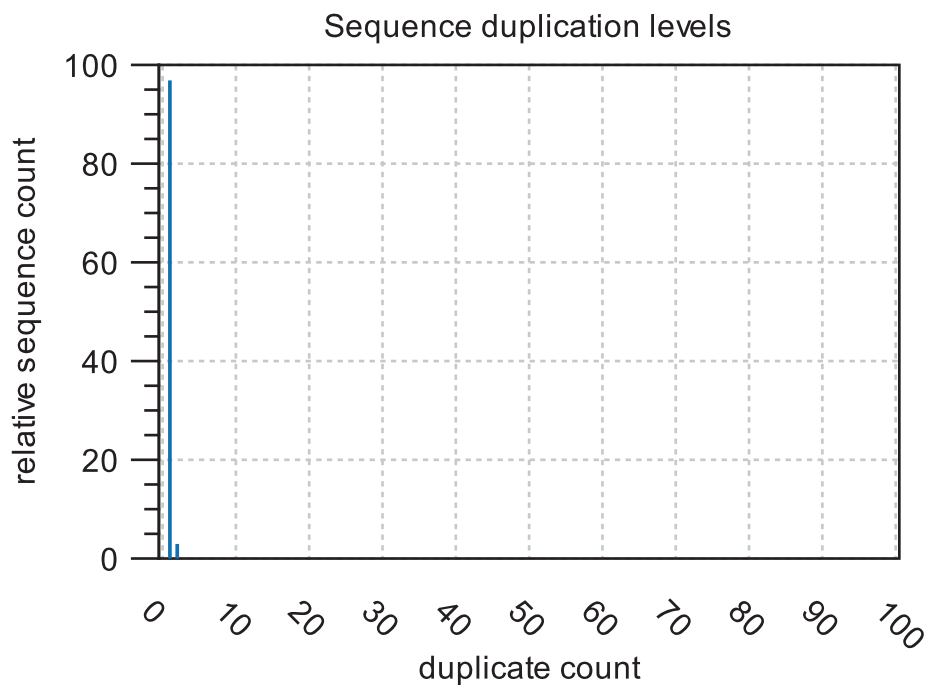

Duplication level distribution. Duplication levels are simply the count of how often a particular sequence has been found.  
x: duplicate count  
y: number of sequences that have been found that many times normalized to the number of unique sequences

## 4.3 Duplicated sequences

A table of over-represented sequences is given in the supplementary report



# Illumina data Quality Report

## 1. Summary

|                               |                              |
|-------------------------------|------------------------------|
| Creation date:                | Thu Dec 11 14:05:57 EST 2014 |
| Generated by:                 | uks                          |
| Software:                     | CLC Genomics Workbench 7.5.1 |
| Based upon:                   | 1 data set                   |
| DSMZ_R1 (paired):             | 3,689,644 sequences in pairs |
| Total nucleotides in data set | 554,448,529 nucleotides      |

## 2. Per-sequence analysis

### 2.1 Lengths distribution

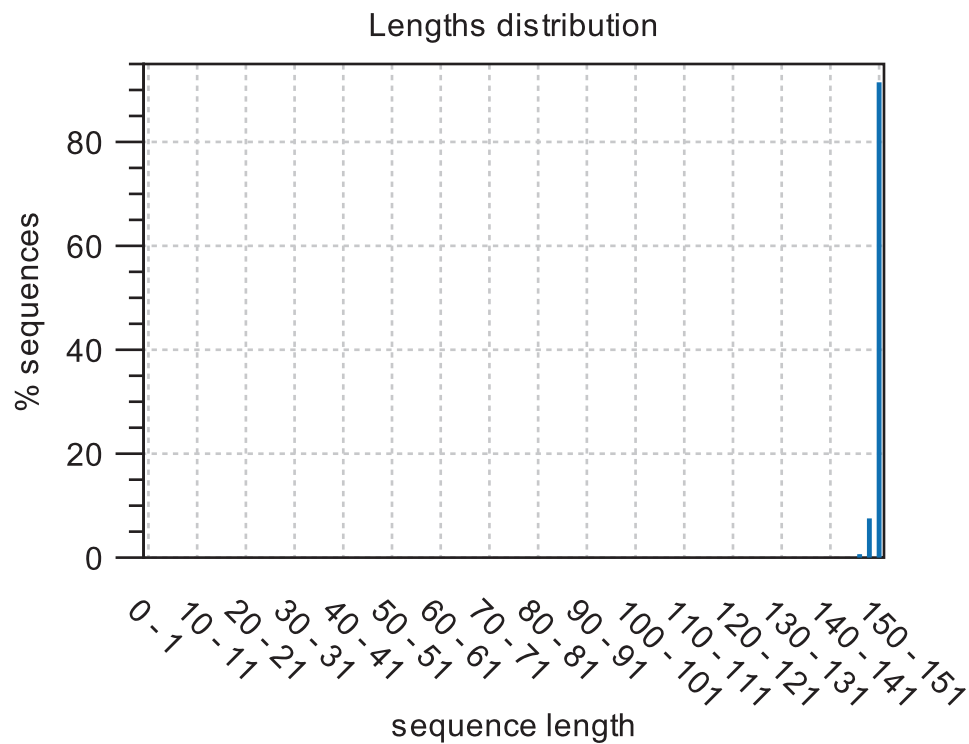

Distribution of sequence lengths. In cases of untrimmed Illumina or SOLiD reads it will just contain a single peak.

x: sequence length in base-pairs

y: number of sequences featuring a particular length normalized to the total number of sequences

## 2.2 GC-content

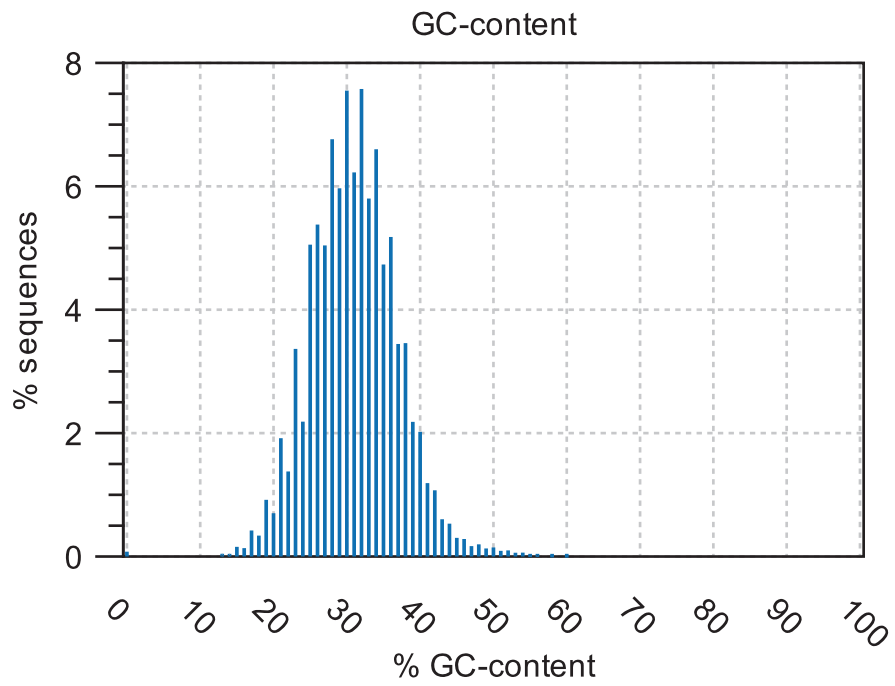

Distribution of GC-contents. The GC-content of a sequence is calculated as the number of G C-bases compared to all bases (including ambiguous bases).

x: relative GC-content of a sequence in percent

y: number of sequences featuring particular GC-percentages normalized to the total number of sequences

## 2.3 Ambiguous base-content

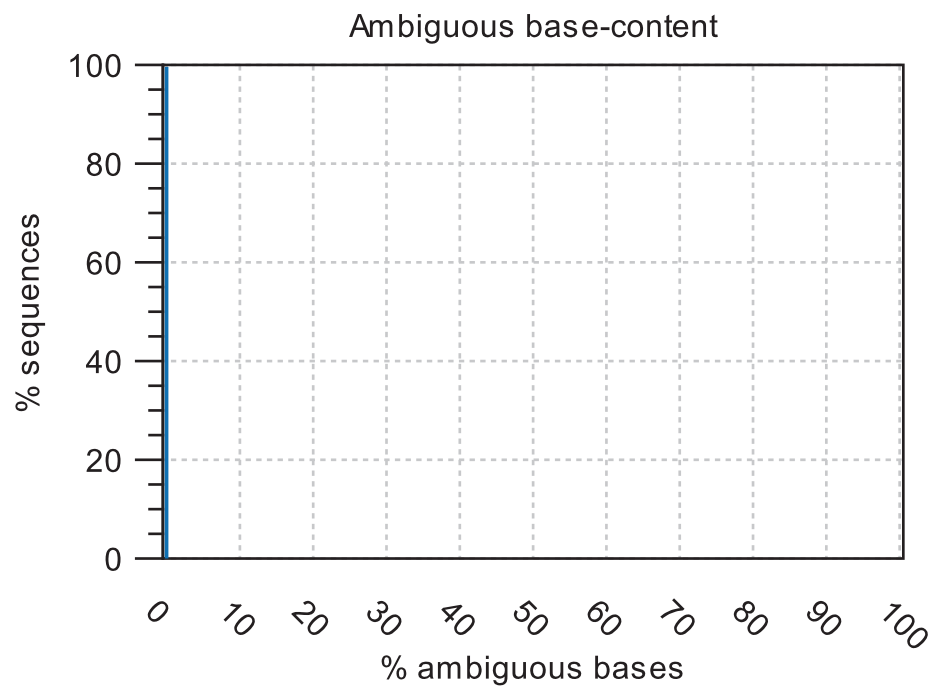

Distribution of N-contents. The N-content of a sequence is calculated as the number of ambiguous bases compared to all bases.

x: relative N-content of a sequence in percent

y: number of sequences featuring particular N-percentages normalized to the total number of sequences

## 2.4 Quality distribution

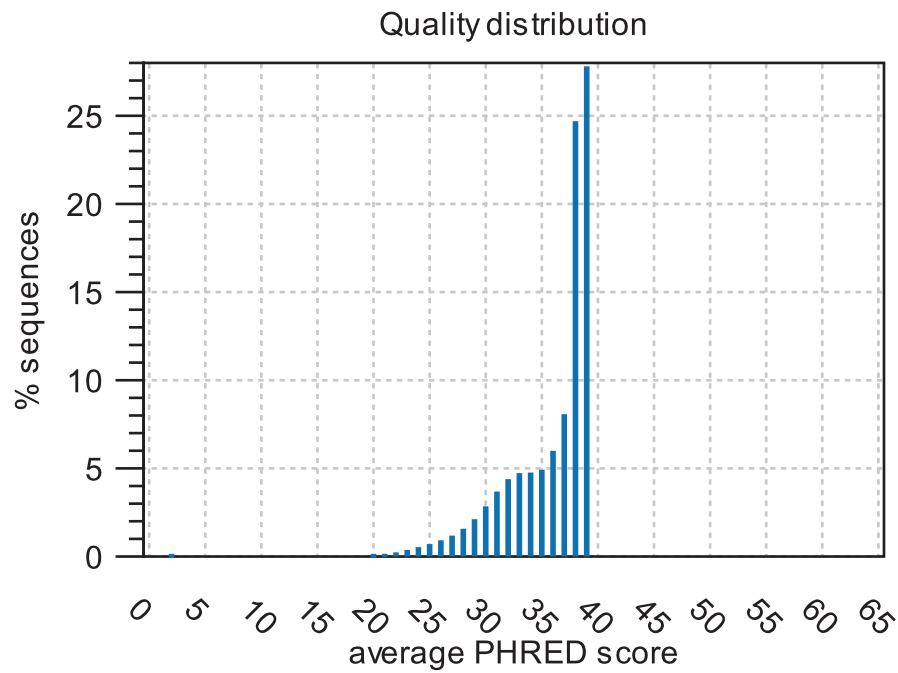

Distribution of average sequence quality scores. The quality of a sequence is calculated as the arithmetic mean of its base qualities.

x: PHRED-score

y: number of sequences observed at that qual. score normalized to the total number of sequences

## 3. Per-base analysis

### 3.1 Coverage

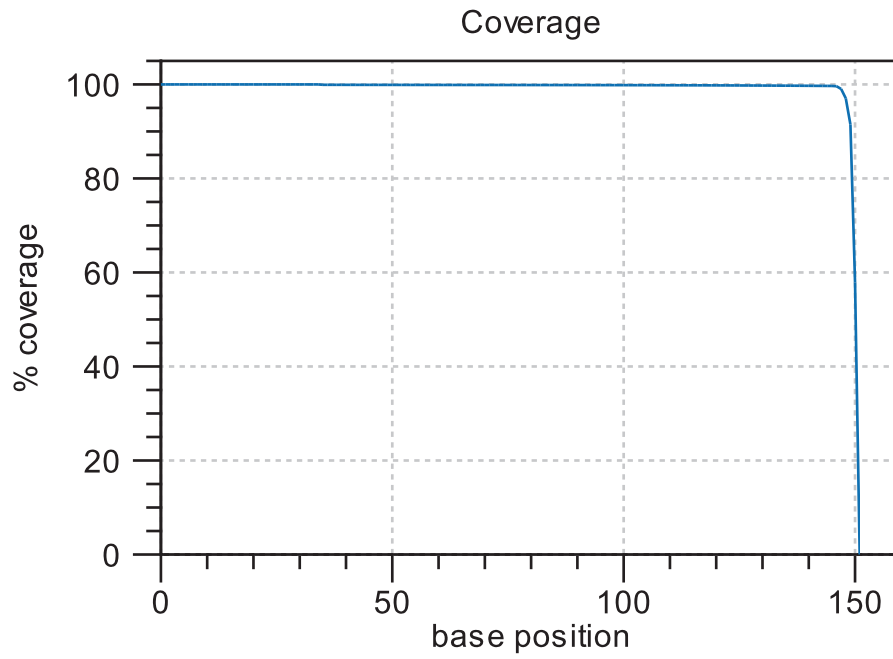

The number of sequences that support (cover) the individual base positions. In cases of untrimmed Illumina or SOLiD reads it will just contain a rectangle.

x: base position

y: number of sequences covering individual base positions normalized to the total number of sequences

## 3.2 Nucleotide contributions

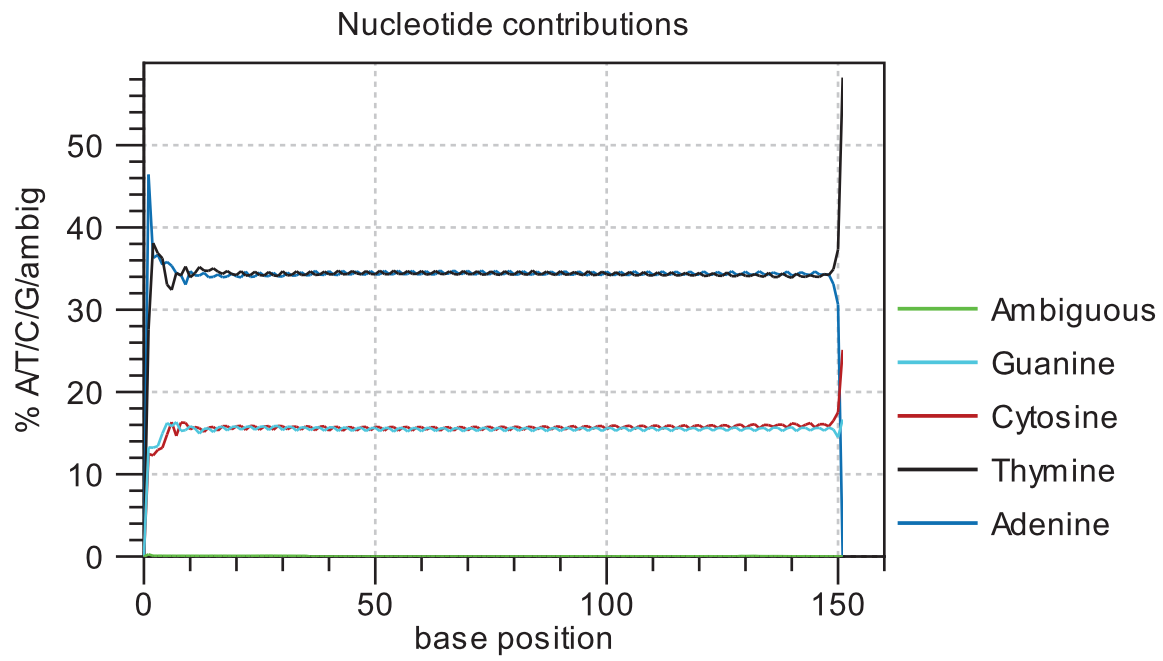

Coverages for the four DNA nucleotides and ambiguous bases.

x: base position

y: number of nucleotides observed per type normalized to the total number of nucleotides observed at that position

### 3.3 GC-content

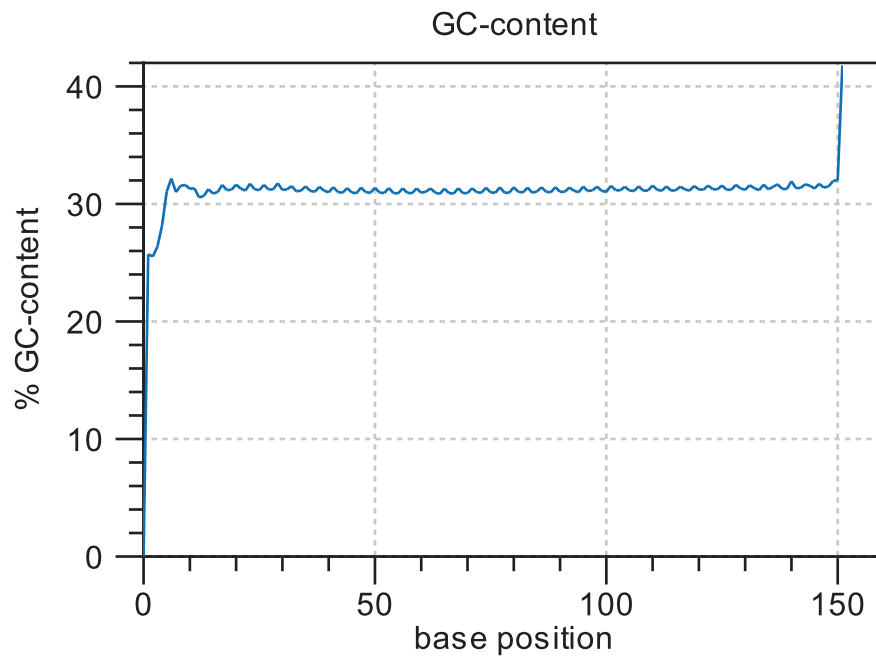

Combined coverage of G- and C-bases.

x: base position

y: number of G- and C-bases observed at current position normalized to the total number of bases observed at that position

### 3.4 Ambiguous base-content

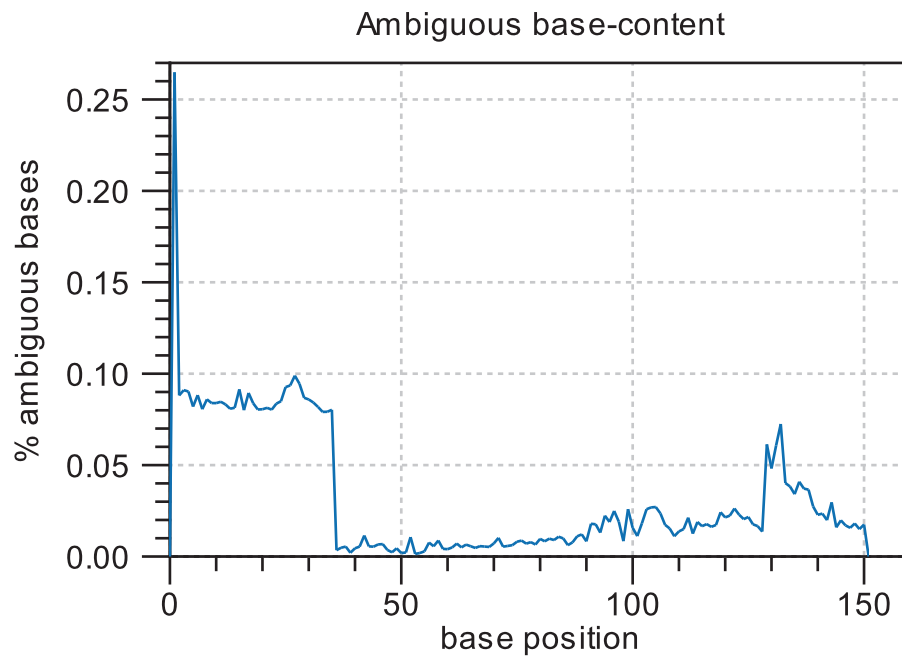

Combined coverage of ambiguous bases.

x: base position

y: number of ambiguous bases observed at current position normalized to the total number of bases observed at that position



### 3.5 Quality distribution

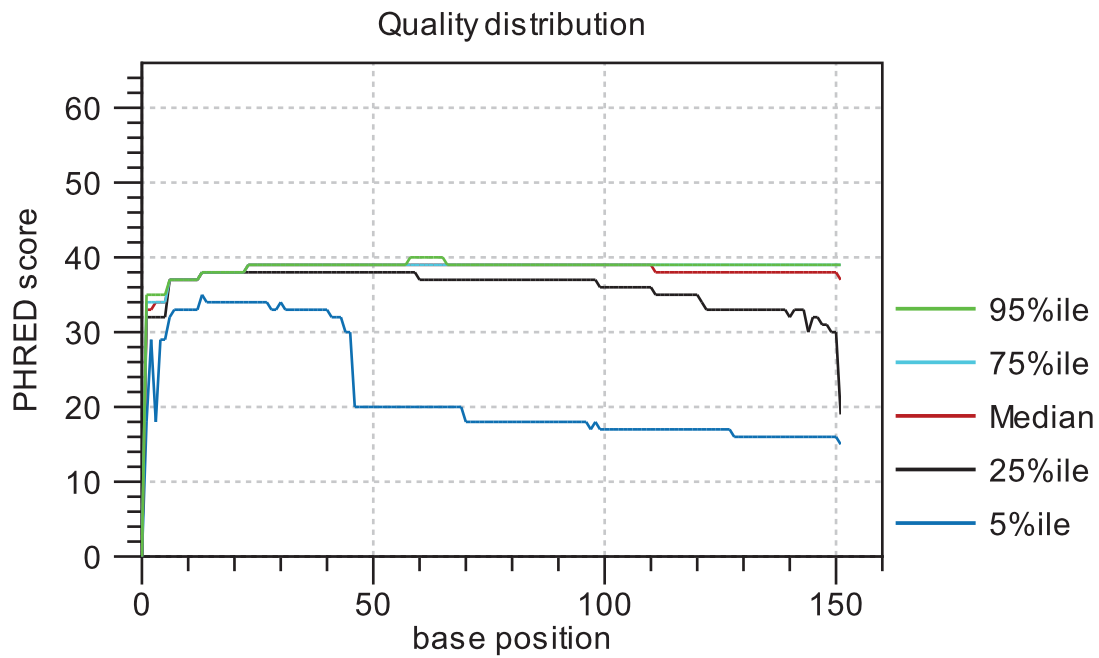

Base-quality distribution along the base positions.  
x: base position  
y: median & percentiles of quality scores observed at that base position

### 4. Over-representation analyses

## 4.1 Enriched 5mers

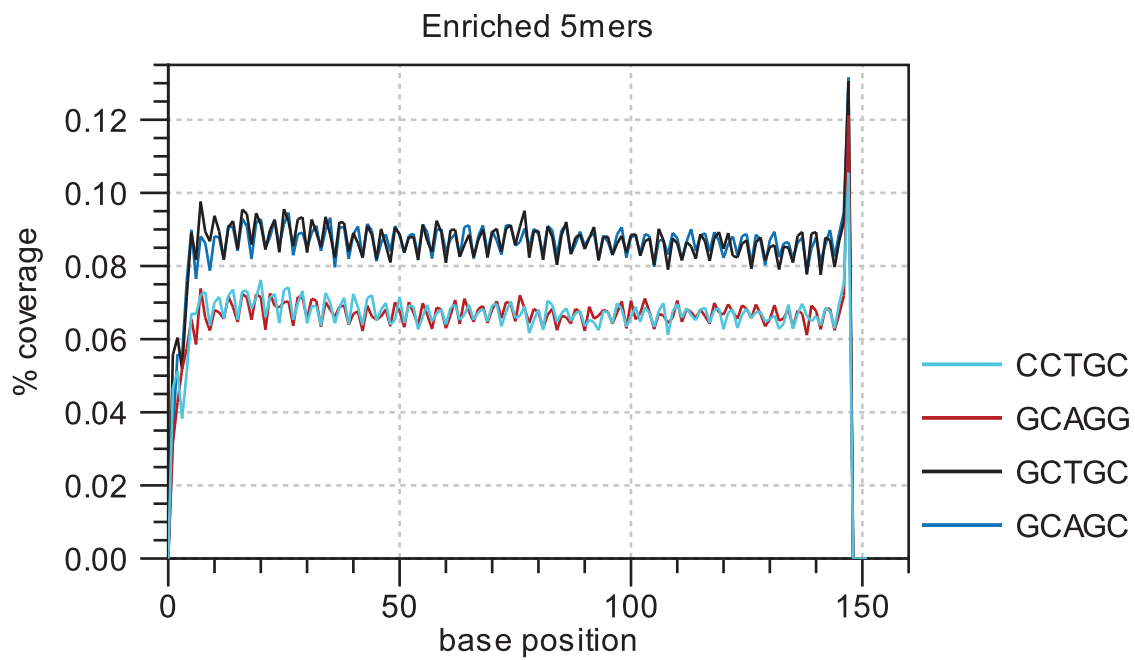

The five most-overrepresented 5mers. The over-representation of a 5mer is calculated as the ratio of the observed and expected 5mer frequency. The expected frequency is calculated as product of the empirical nucleotide probabilities that make up the 5mer. (5mers that contain ambiguous bases are ignored)

x: base position

y: number of times a 5mer has been observed normalized to all 5mers observed at that position

## 4.2 Sequence duplication levels

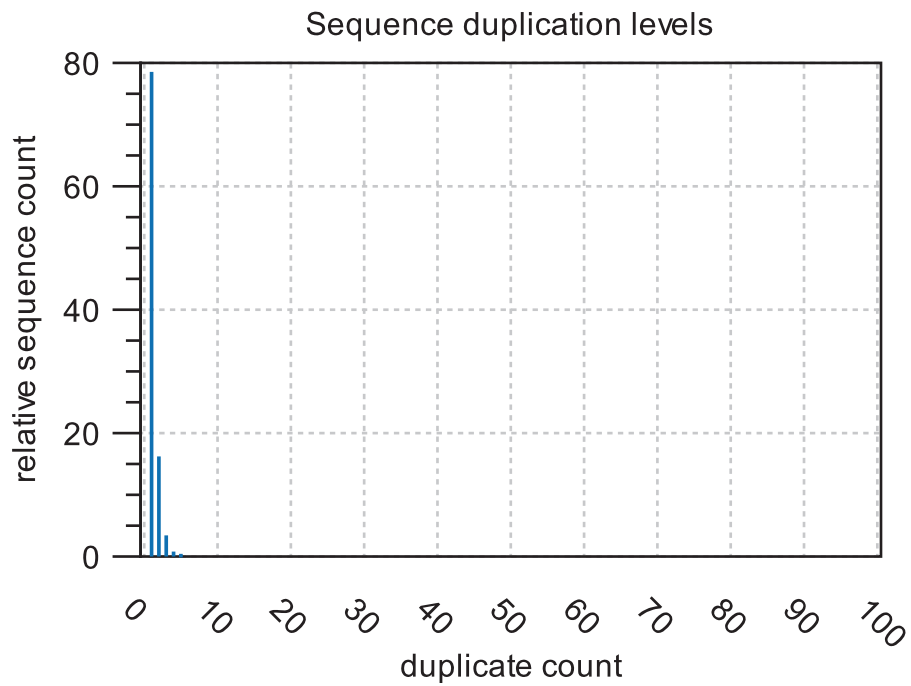

Duplication level distribution. Duplication levels are simply the count of how often a particular sequence has been found.  
x: duplicate count  
y: number of sequences that have been found that many times normalized to the number of unique sequences

## 4.3 Duplicated sequences

A table of over-represented sequences is given in the supplementary report

## Guide for downloading the described datasets using NCBI SRA Toolkit

### Pre-requisites:

1. Appropriate version of NCBI SRA Toolkit Installed on the system.
2. Following downloading instructions are provided for the Linux based operating systems.

### Steps:

1. Launch Linux terminal and navigate to NCBI SRA Toolkit installed location.
2. Navigate to /bin/ directory.
3. Respective commands for each dataset are mentioned below:

#### Download Illumina PE dataset with accession SRR989790

```
fastq-dump -I --split-files SRR989790
```

#### Download 454 3 Kb PE dataset with accession SRR989497

```
sff-dump SRR989497
```

#### Download 454 shotgun dataset with accession SRR1748017

```
sff-dump SRR1748017
```

#### Download Ion Torrent dataset with accession SRR1748018

```
sff-dump SRR1748018
```

#### Download PacBio RS II dataset with accession SRR989791

```
fastq-dump SRR989791
```

The dataset size and md5 checksum values for each dataset is provided in table below:

Table S1 – Dataset properties after download from SRA.

| <b>Data Type</b>  | <b>Accession</b> | <b>File names</b> | <b>Size</b> | <b>md5 checksum</b>              |
|-------------------|------------------|-------------------|-------------|----------------------------------|
| Roche 454 shotgun | SRR1748017       | SRR1748017.sff    | 1.5 Gb      | 950975500428cc5cd91b9a03dbafd877 |
| Roche 454 3 kb    | SRR989497        | SRR989497.sff     | 1.4 Gb      | 4d9f35e94ff9625980d853df63a1cb24 |
| Illumina          | SRR989790        | SRR989790_1.fastq | 669 Mb      | 750352f0fbccc593dce4c3eaacbae6e0 |
|                   |                  | SRR989790_2.fastq | 669 Mb      | fa8dfd498d3f16f94541ebfb3f9d5859 |
| Ion Torrent       | SRR1748018       | SRR1748018.sff    | 858 Mb      | a17df0c66161dea8d65bdeace023c135 |
| PacBio RS II      | SRR989791        | SRR989791.fastq   | 1.5 Gb      | 0eb1b192bf1f9b6c141903787fa38bf9 |
